# Supplementary material for: A DFT study on the N2O reduction by CO molecule over silicon carbide nanotubes and nanosheets
Source: Royal Society of Chemistry journal article supplement (doi:10.1039/c6ra07548g), 2016-01-01
Supplement: c6ra07548g1.pdf [file c6ra07548g1.pdf]

# “Supporting Information”

## **A DFT study on the N<sub>2</sub>O reduction by CO molecule over silicon carbide nanotubes and nanosheets**

Parisa Nematollahi and Mehdi D. Esrafil<sup>\*</sup>

Laboratory of Theoretical Chemistry, Department of Chemistry, University of Maragheh, Maragheh, Iran

**\*** Corresponding author. **Phone:** (+98) 4212237955. **Fax:** (+98) 4212276060. **P.O. Box:** 5513864596. **E-mail:** [esrafil@maragheh.ac.ir](mailto:esrafil@maragheh.ac.ir) (Mehdi D. Esrafil).

**Figure S1.** Optimized structures of pristine, adsorbed  $\text{N}_2\text{O}$  and  $\text{CO}$  molecule over a (5,0) SiCNT (complexes **I**, **J**) and a long-length (6,0) SiCNT (complexes **K**, **L**). All bond distances are in Å.

(5,0) SiCNT

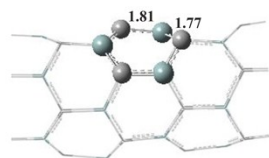

(I)

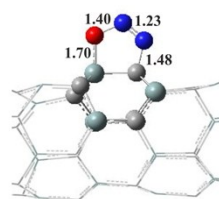

(J)

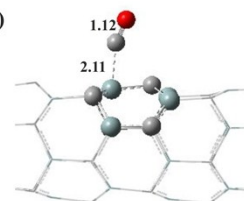

Long-length (6,0) SiCNT

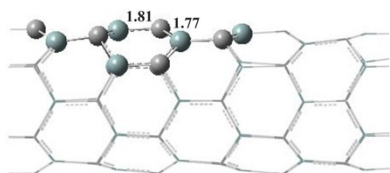

(K)

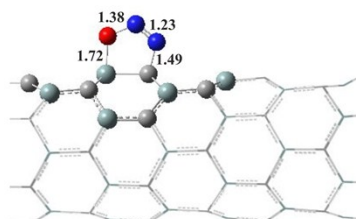

(L)

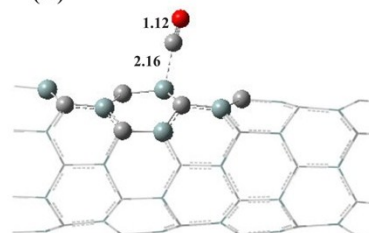

**Figure S2.** Reaction energy profiles and the corresponding optimized structures (at the M062X/6-31G\* level) of the stationary points for the direct reduction of N<sub>2</sub>O by CO. All energy values and distances are in eV and Å, respectively.

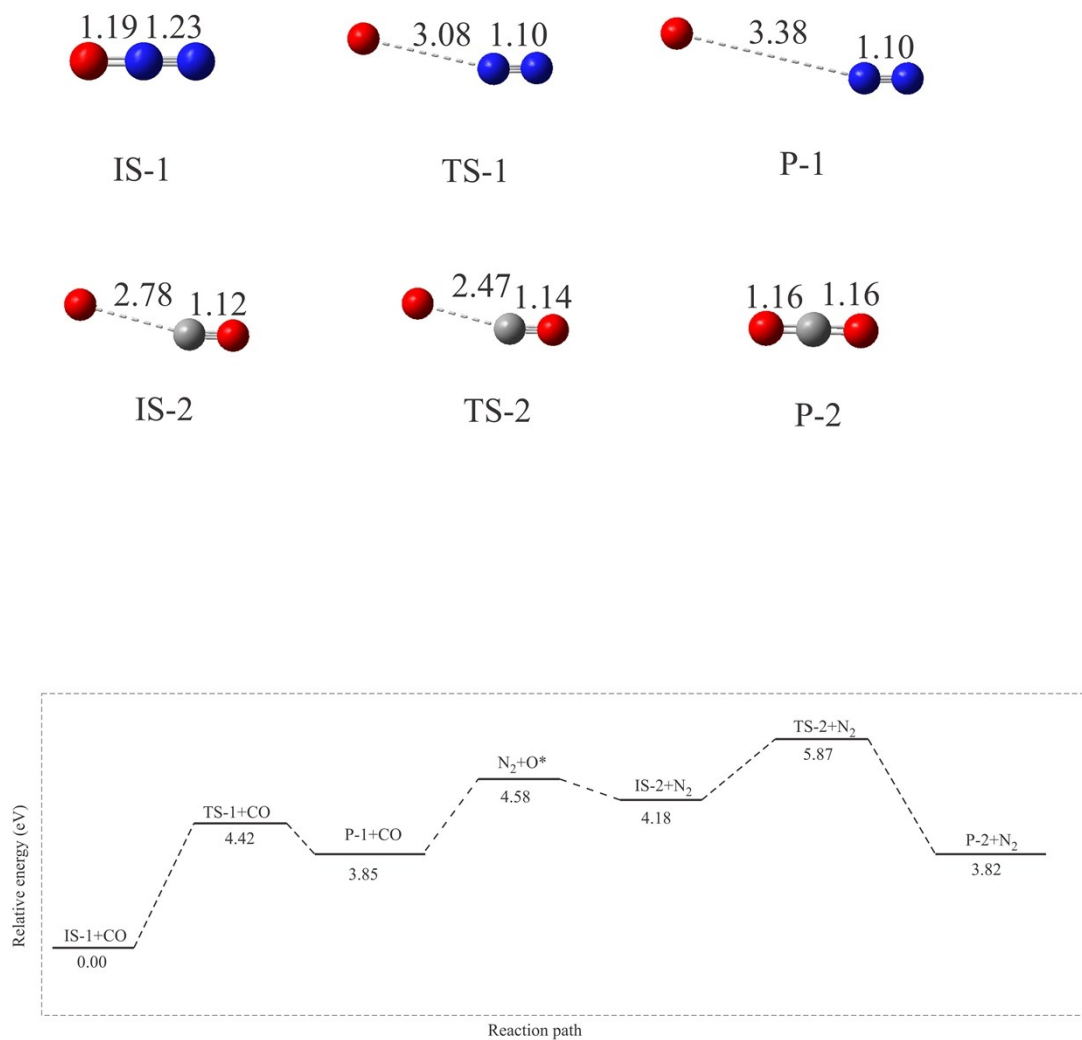

**Figure S3.** Reaction energy profiles and the corresponding optimized structures of the stationary points for the reduction of  $\text{N}_2\text{O}$  by CO over the (5,0) SiCNT. All energy values and distances are in eV and Å, respectively.

**SiCNT(5,0)**

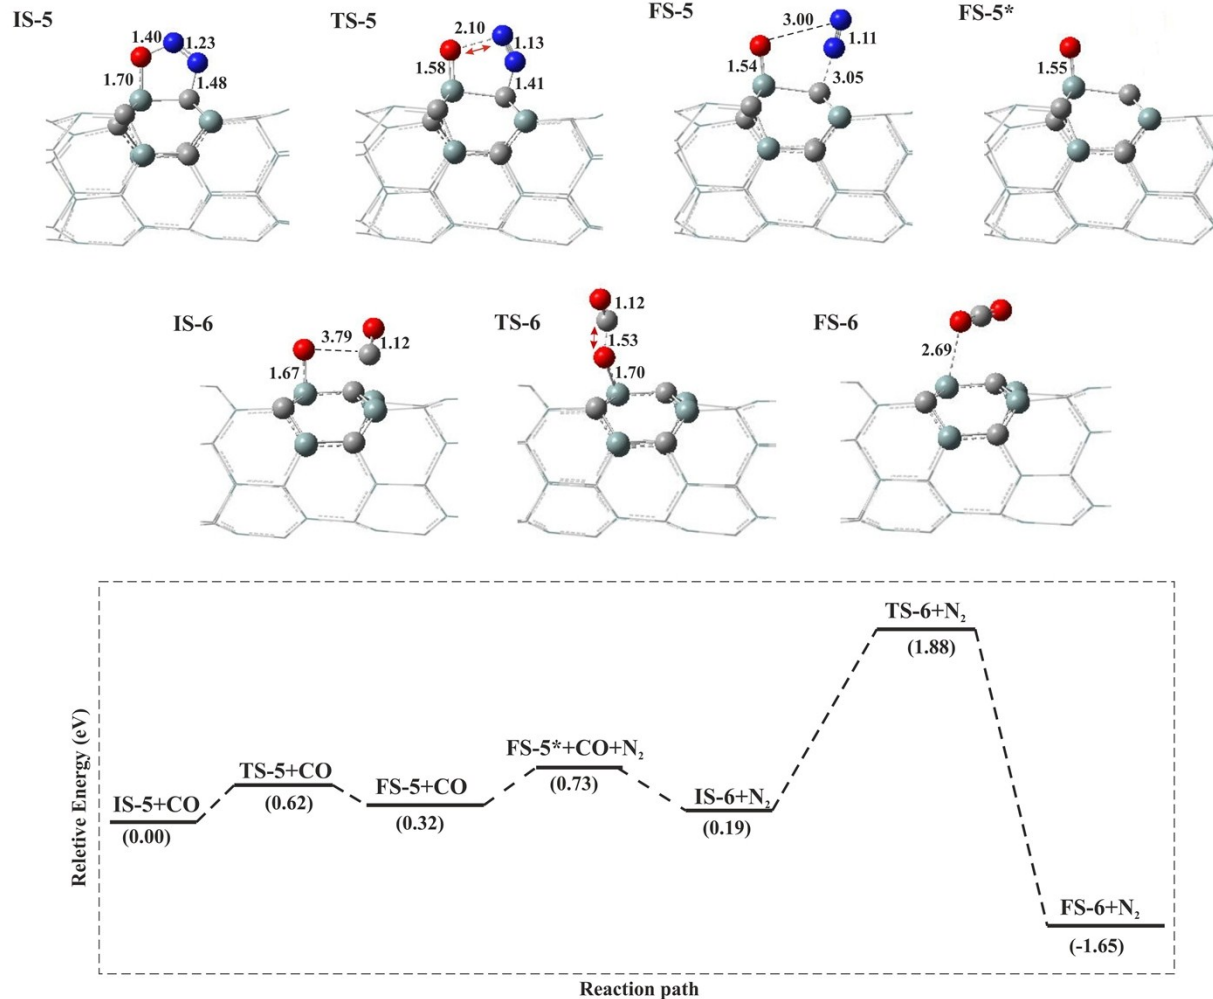

**Table S1.** Calculated binding distances (R), adsorption energies ( $E_{\text{ads}}$ ), Mulliken ( $q_{\text{CT,M}}$ ) and Hirshfeld ( $q_{\text{CT,H}}$ ) charge-transfer values of adsorbed  $\text{N}_2\text{O}$  and CO molecules over the (5,0) SiCNT (complexes **E** and **F**) and long-length (6,0) SiCNT (complexes **G** and **H**)

| configuration                  | R (Å) | $E_{\text{ads}}$ (eV) | $q_{\text{CT,M}}$ (e) | $q_{\text{CT,H}}$ (e) |
|--------------------------------|-------|-----------------------|-----------------------|-----------------------|
| <i>(5,0) SiCNT</i>             |       |                       |                       |                       |
| <b>E</b>                       | 1.70  | -0.86                 | 0.54                  | 0.32                  |
| <b>F</b>                       | 2.11  | -0.48                 | 0.17                  | 0.12                  |
| <i>Long-length (6,0) SiCNT</i> |       |                       |                       |                       |
| <b>G</b>                       | 1.72  | -0.69                 | 0.55                  | 0.30                  |
| <b>H</b>                       | 2.16  | -0.47                 | 0.16                  | 0.10                  |

**Table S2.** Calculated activation energy ( $E_{\text{act}}$ ) and reaction energy ( $\Delta E$ ) for different pathways of reduction of  $\text{N}_2\text{O}$  by CO molecule over (5,0) SiCNT

| Reaction                | $E_{\text{act}}$ (eV) | $\Delta E$ (eV) |
|-------------------------|-----------------------|-----------------|
| (5,0) SiCNT             |                       |                 |
| IS-5 $\rightarrow$ FS-5 | 0.62                  | 0.32            |
| IS-6 $\rightarrow$ FS-6 | 1.69                  | -1.84           |
